# Supplementary material
Source: publisher site journal article supplement (https://www.dovepress.com/article/586934)
Supplement: Supplementary file 1 [file 586934%20Supplementary%20Material.docx]

**Supplementary Material**

Journal of Multidisciplinary Healthcare

| **Supplement Table 1. Full Questionnaire including answers** | | |
| --- | --- | --- |
| **No.** | **Question** | **Response options / scale** |
| **1** | **How old are you?** | **- <20 years - 20-30 years - 30-40 years - 40-50 years - 50-60 years - >60 years** |
| **2** | **How many years of professional experience do you have?** | **- <1 year - 2-4 years - >5 years - >10 years** |
| **3** | **What is your profession?** | **- Midwifery student / trainee - Medical student - Midwife working mainly in a hospital setting - Midwife working mainly in out-of-hospital care - Midwife working in a birth center - Resident physician - Specialist / board-certified obstetrician-gynecologist - Senior physician / consultant - Head of department / chief physician - Other** |
| **4** | **Approximately how many births do you personally attend per week on average over the last year?** | **- <5 - 5-10 - 10-20 - 20-30 - >30** |
| **5** | **How do you monitor the fetal heart rate during labor?** | **- Intermittent auscultation - CTG - CTG with STAN - Not at all** |
| **6** | **According to which criteria do you assess the fetal heart rate during labor?** | **- DGGG - NICE - FIGO - Fischer - Physiological CTG - Internal SOP - Other** |
| **7** | **Who trained you in CTG interpretation? (Multiple answers possible)** | **- Part of my studies / professional training - Medical colleagues - Midwifery colleagues - Learning by doing over time - Textbook - I did not receive proper formal training specifically in CTG interpretation** |
| **8** | **How well prepared did you feel for your first birth managed independently as the physician on duty / responsible midwife?** | **- Does not apply at all -> fully applies** |
| **9** | **How many CTG training courses have you attended in the last 5 years?** | **- None - 1-2 - 2-4 - >5** |
| **10** | **In your opinion, is there a need for CTG training courses in Germany?** | **- Yes - No** |
| **11** | **Do you use MBU (fetal blood sampling)?** | **- Yes - No** |
| **12** | **MBU (fetal blood sampling) provides me with a reliable method for assessing fetal well-being.** | **- Fully agree -> do not agree at all** |
| **13** | **With the introduction of CTG, it has been shown that... (Multiple answers possible)** | **- the rate of fetal blood sampling is reduced - the rate of operative vaginal deliveries is reduced - the cesarean section rate is increased - the rate of fetal acidosis is reduced - the rate of infantile cerebral palsy is reduced - none of the above** |
| **14** | **CTG makes me feel confident in assessing fetal well-being during labor.** | **- Fully agree -> do not agree at all** |
| **15** | **The classification system I use provides me with clear recommendations for action that I can apply to most situations in the delivery room.** | **- Fully agree -> do not agree at all** |
| **16** | **How many births take place annually in your hospital?** | **- <500 - 500-1000 - 1000-2000 - 2000-3000 - >3000** |
| **17** | **How many physicians are on duty in your hospital?** | **- None - 1 - 2 - 3 - >3** |
| **18** | **What is the midwife-to-patient ratio during labor?** | **- 1:1 - 1:2 - 1:3 - >1:3** |
| **19** | **My workplace is: (brief information in a few key words)** | **- Perinatal center level 1 - Perinatal center level 2 - Perinatal center with extended care - Standard maternity unit** |
| **20** | **Are there regular in-house CTG training sessions in your institution?** | **- Yes - No** |
| **21** | **Is there an internal institutional standard for the management of abnormal CTG findings?** | **- Yes - No** |
| **22** | **When did you first independently manage a birth?** | **- Already during training (midwives) - After completing training - During specialist training: 1st year - During specialist training: 2nd year - During specialist training: 3rd year - During specialist training: 4th year - During specialist training: 5th year** |
| **23** | **Is there a systematic onboarding process for the delivery room in your institution?** | **- Yes - No - If yes, duration: 1 week - If yes, duration: 2 weeks - If yes, duration: 4 weeks - If yes, duration: >4 weeks - CTG training is an important component: Yes - CTG training is an important component: No** |
| **24** | **Do you distinguish between high-risk and low-risk patients during labor?** | **- Yes - No** |
| **25** | **Have you ever attended a lecture on physiological CTG?** | **- Yes - No** |
| **26** | **For me personally, CTG interpretation is difficult because... (Multiple answers possible)** | **- there is often an unexpectedly good outcome - there is often an unexpectedly poor outcome - the same CTG is interpreted differently by different colleagues - the same CTG is interpreted differently after some time - it gives me a false sense of security - I do not have any difficulties with CTG interpretation** |

**Supplement Table 2. Choice of evaluation criteria for CTG interpretation depending on years of professional experience.**


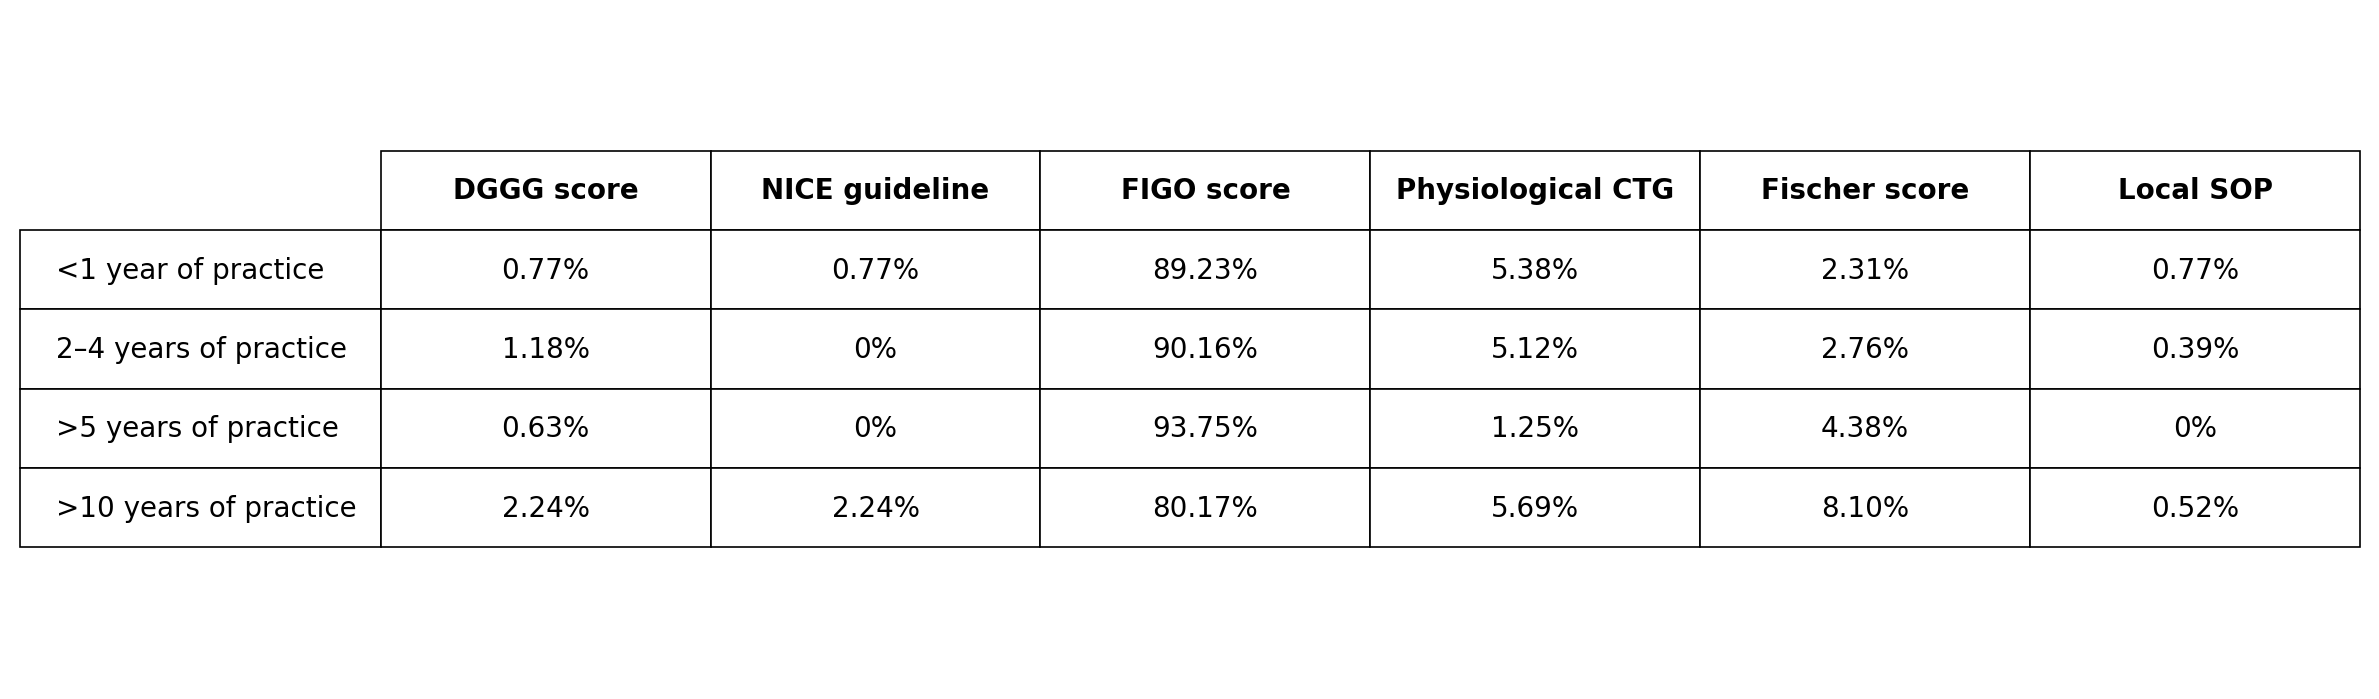


**Legend:** The FIGO score is used most frequently overall. Additionally, practitioners with longer professional experience use the Fischer score more often. n = 1124/1132.

**Supplement Figure 1. Distribution of professions.**


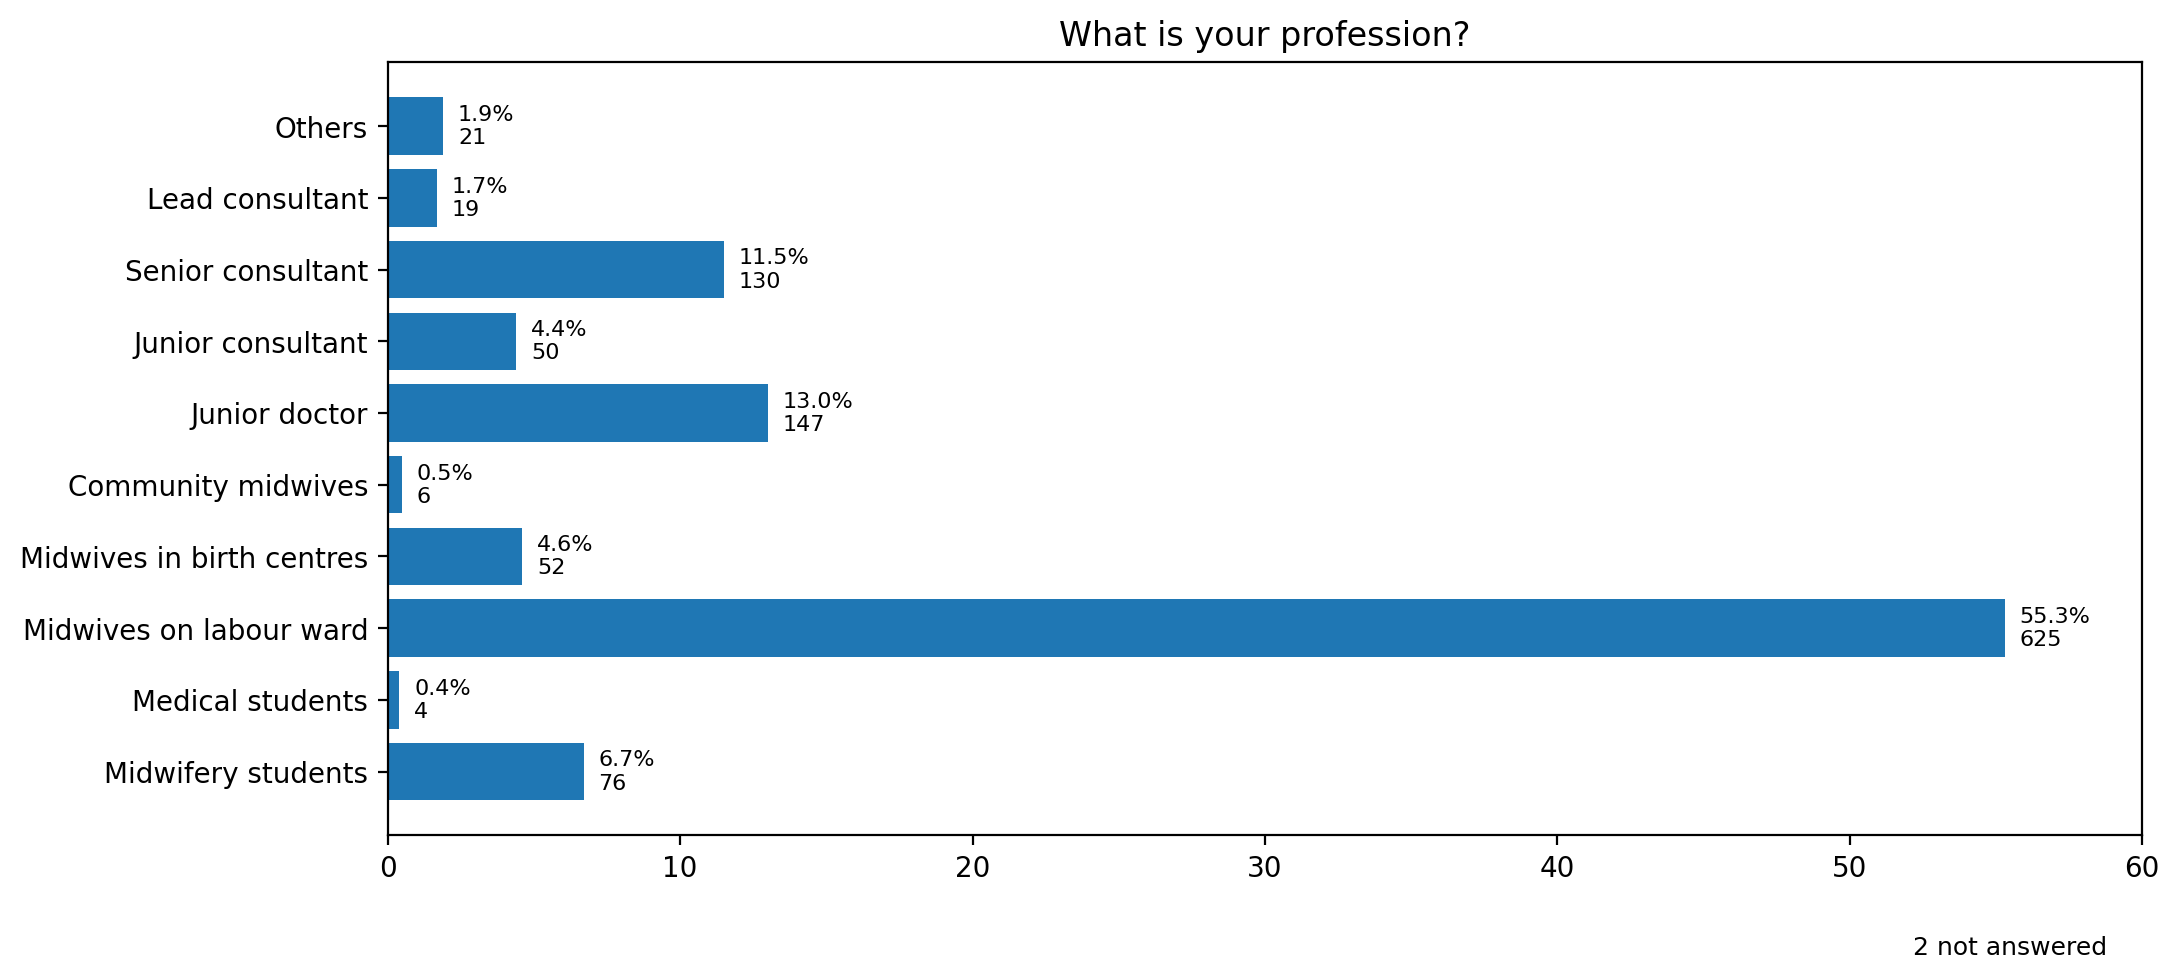


**Legend:** A total of 1,132 participants responded, including 763 (trainee) midwives and 346 (trainee) physicians. Two respondents did not answer this item.

**Supplement Figure 2. Perceived reliability of fetal blood sampling (FBS) in assessing fetal well-being.**


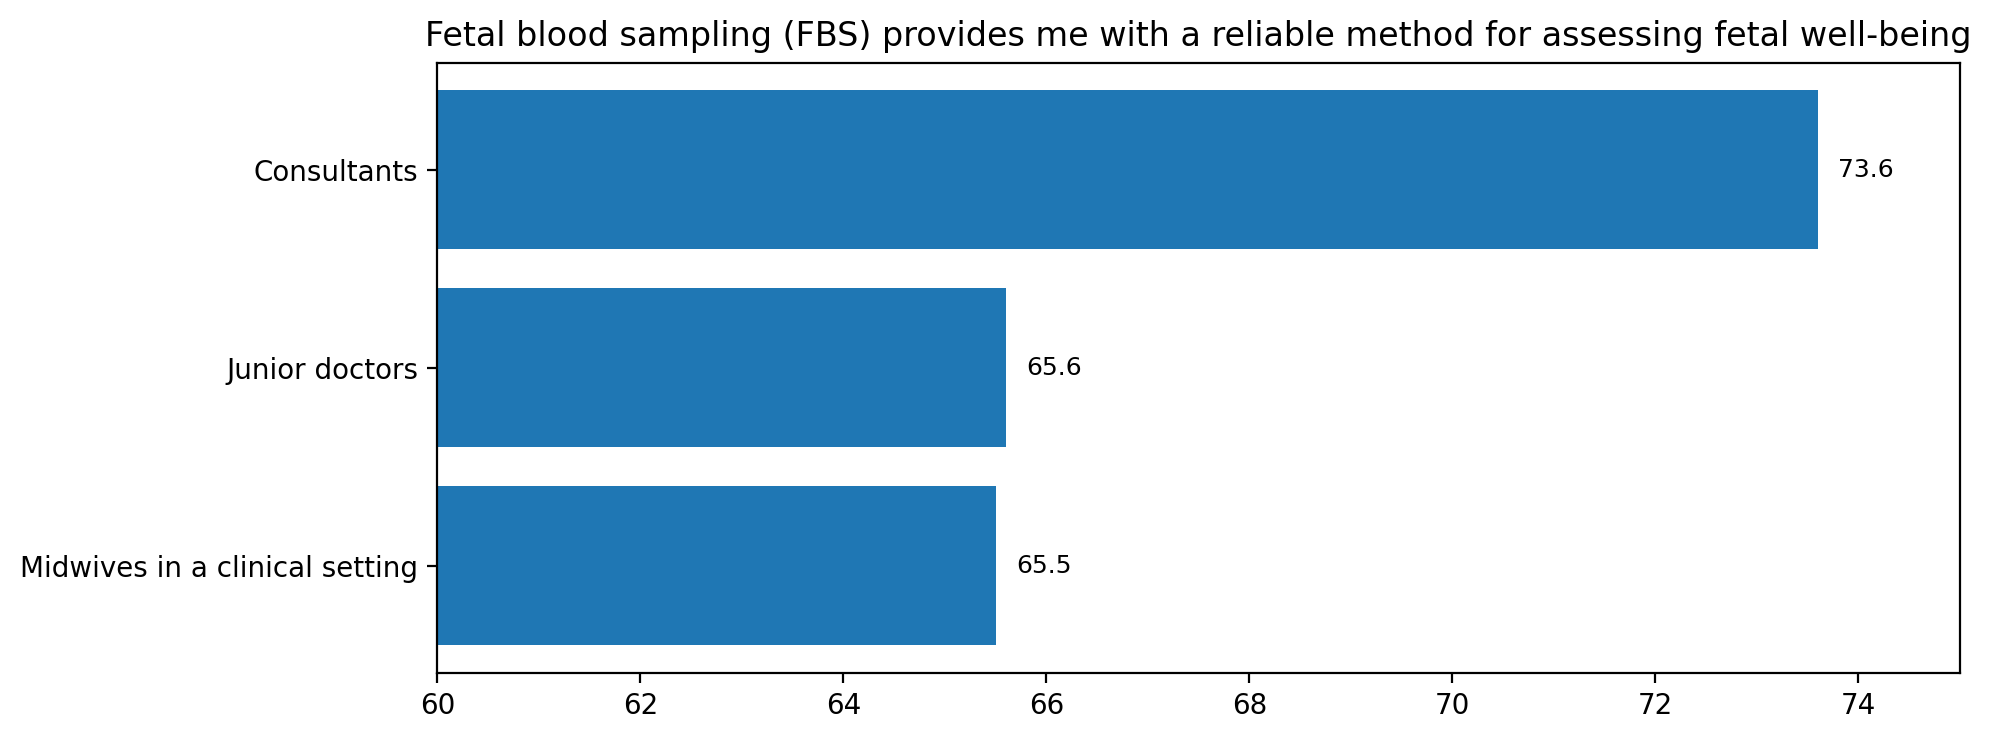


**Legend:** Participants provided an intuitive rating on a scale from 0 to 100, where 100 indicates “very reliable” and 0 indicates “very unreliable.” The results suggest uncertainty regarding the reliability of fetal blood sampling (FBS). Consultants reported higher confidence than midwives and junior doctors. Total sample: consultants n = 146 (M = 73.6, SD = ±26.0); midwives n = 667 (M = 65.5, SD = ±25.5); junior doctors n = 146 (M = 65.6, SD = ±26.9).

**Abbreviations:** FBS, fetal blood sampling; M, median; SD, standard deviation.

**Supplement Figure 3. Duration of delivery room onboarding.**


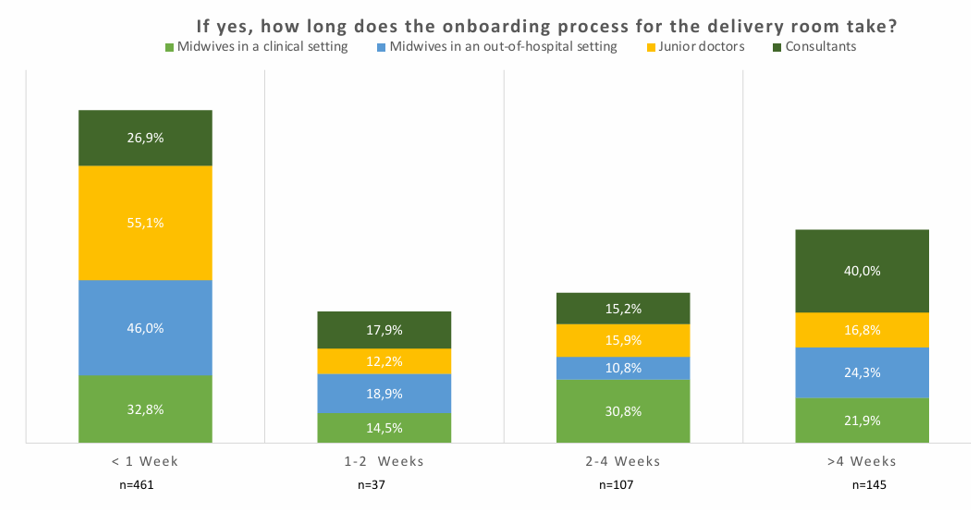


**Legend:** In cases where onboarding is provided, its duration varies among respondents. An onboarding period of less than one week was reported by 55.1% of junior doctors and 26.9% of consultants. In contrast, training lasting more than four weeks was reported by 16.8% of junior doctors and 40.0% of consultants.

**Supplement Figure 4. CTG training as part of onboarding.**


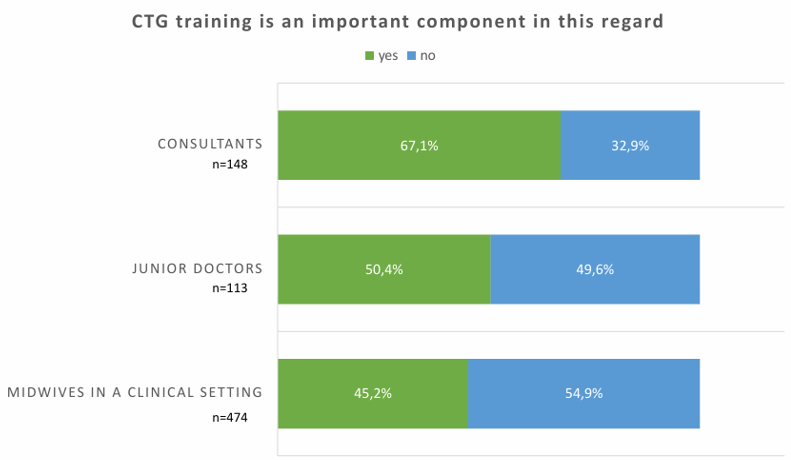


**Legend:** In cases where onboarding is provided, 50.4% of surveyed junior doctors reported that CTG training is an essential component. Among midwives, this proportion is lower, while it is higher among consultants.
